# Supplementary material for: Long-term-stable, solution-processable, electrochromic carbon nanotubes/polymer composite for smart supercapacitor with wide working potential window
Source: Royal Society of Chemistry journal article supplement (doi:10.1039/c8ta04465a), 2018-01-01
Supplement: c8ta04465a1.pdf [file c8ta04465a1.pdf]

## Supporting Information

### **Long-Term-Stable, Solution-Processable, Electrochromic Carbon Nanotubes/Polymer Composite for Smart Supercapacitor with Wide Working Potential Window**

Tongtong Ye<sup>a</sup>, Ying Sun<sup>a\*</sup>, Xuan Zhao<sup>a</sup>, Baoping Lin<sup>a\*</sup>, Hong Yang<sup>a</sup>, Xueqin Zhang<sup>a</sup> and  
Linxiang Guo<sup>a</sup>.

School of Chemistry and Chemical Engineering, Southeast University, Nanjing,  
211189, P. R. China

\*Author to whom correspondence should be addressed

Email: [sunyseu@seu.edu.cn](mailto:sunyseu@seu.edu.cn) (S.Y.), [lbp@seu.edu.cn](mailto:lbp@seu.edu.cn) (L.B.)

## Contents

|                                                                                                                   |     |
|-------------------------------------------------------------------------------------------------------------------|-----|
| 1. <sup>1</sup> HNMR spectra of 2,7-Dibromo-9-(8-bromooctyl)-9H-carbazol and polymer PBDTC in chloroform-d. _____ | S-3 |
| 2. Normalized FT-IR spectra of MWCNT-PBDTC and MWCNT-OH. _____                                                    | S-4 |
| 3. The C1s XPS spectra of PBDTC and MWCNT-PBDTC. _____                                                            | S-4 |
| 4. FE-SEM image of MWCNT-OH. _____                                                                                | S-5 |
| 5. Comparison of solubility of the samples in chloroform. _____                                                   | S-5 |
| 6. Performance of symmetric supercapacitor device in Table 1. _____                                               | S-5 |
| 7. Leakage current and self-discharge curves of MWCNT-PBDTC device. _____                                         | S-6 |
| 8. In situ optical responses of device and the calculation of response times. _____                               | S-6 |

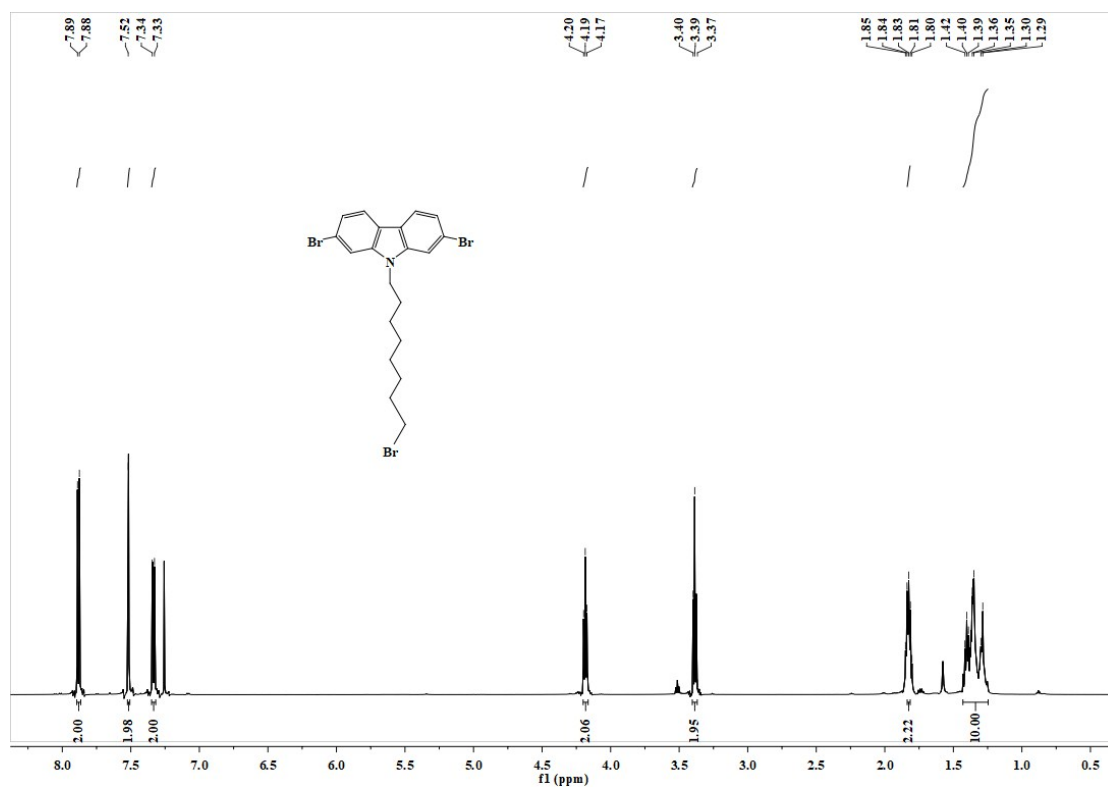

**Fig. S1a.** <sup>1</sup>H NMR spectra of 2,7-Dibromo-9-(8-bromooctyl)-9H-carbazole in chloroform-d.

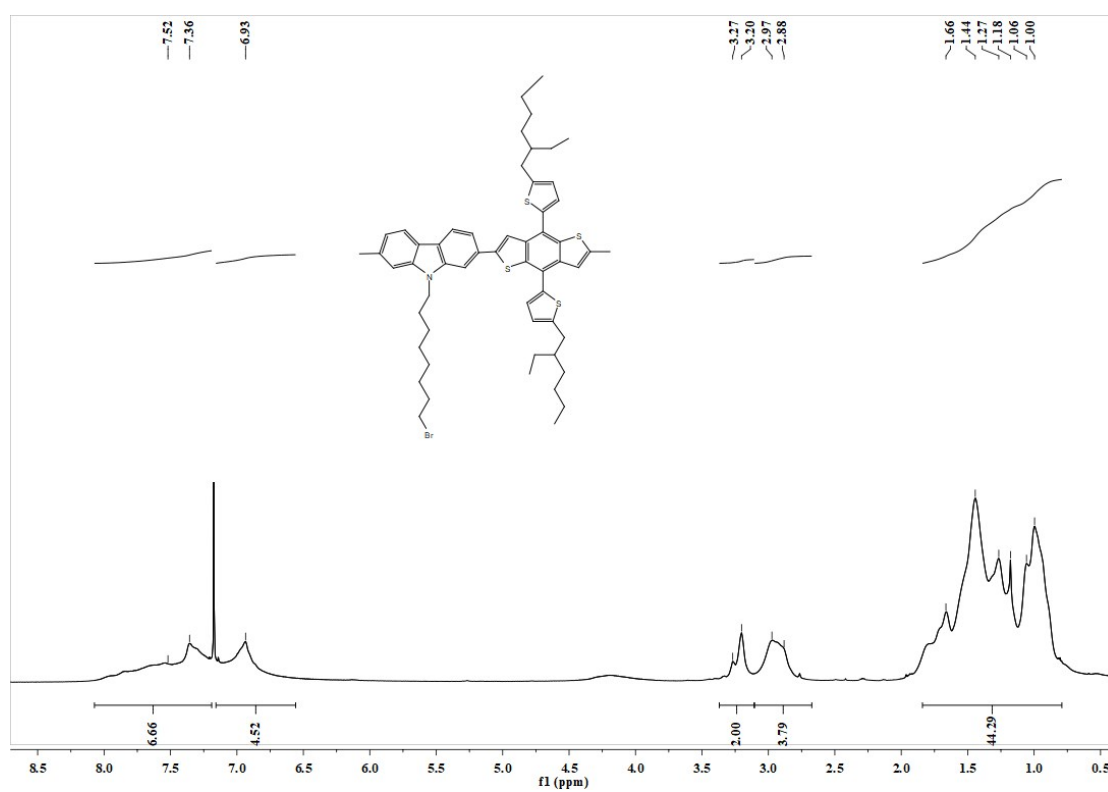

**Fig. S1b.** <sup>1</sup>H NMR spectra of PBDTC in chloroform-d.

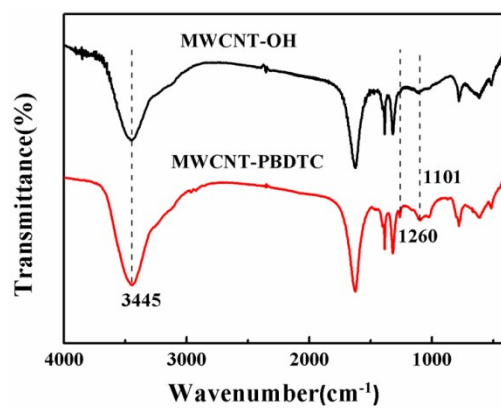

**Fig. S2.** FT-IR spectra of MWCNT-PBDTC and MWCNT-OH.

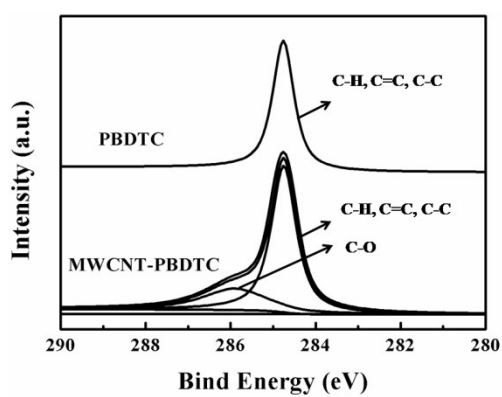

**Fig. S3.** The C1s XPS spectra of PBDTC and MWCNT-PBDTC.

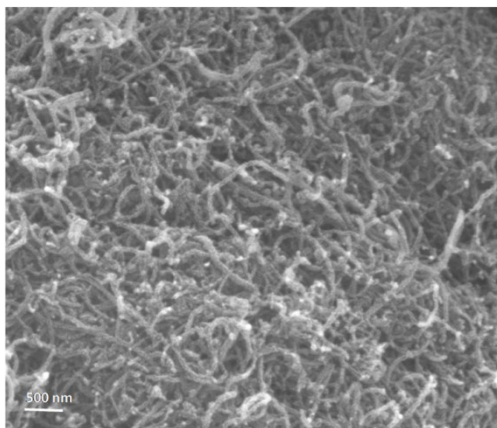

**Fig. S4.** FE-SEM image of MWCNT-OH.

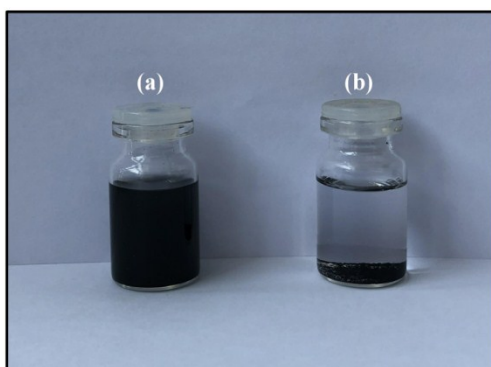

**Fig. S5.** Comparison of solubility of the samples in chloroform: (a) MWCNT-PBDTC, (b) MWCNT-OH. The black dispersion shown in (a) is stable for at least 30 days. The concentration for each sample is  $5 \text{ mg mL}^{-1}$ .

**Table 1.** Performance of symmetric supercapacitor device.

| E ( $\text{W h kg}^{-1}$ ) | P ( $\text{W kg}^{-1}$ ) | E ( $\times 10^{-3} \text{ mW h cm}^{-2}$ ) | P ( $\text{mW cm}^{-2}$ ) |
|----------------------------|--------------------------|---------------------------------------------|---------------------------|
| 174.7                      | 4800                     | 17.47                                       | 0.48                      |
| 148.2                      | 7200                     | 14.82                                       | 0.72                      |
| 135.4                      | 16800                    | 13.54                                       | 1.68                      |
| 129.9                      | 36000                    | 12.30                                       | 3.60                      |
| 120.0                      | 48000                    | 12.00                                       | 4.80                      |

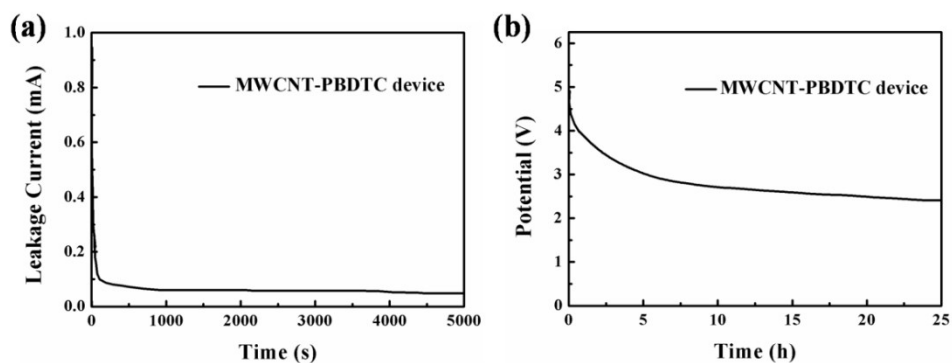

**Fig. S6.** (a) Leakage current curve of MWCNT-PBDTC device charged at 2 mA to 4.8 V and kept at 4.8 V for 5000 s. (b) Self-discharge curve of MWCNT-PBDTC device after charging at 4.8 V for 15 min.

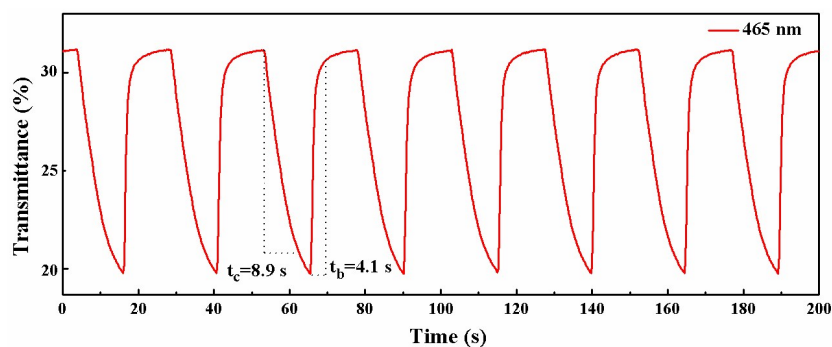

**Fig. S7.** In situ optical responses of device for 30 s per step measured at 465 nm and the calculation of response times.
